# Supplementary material for: The prevalence of thrombocytopenia in patients with acute cancer-associated thrombosis
Source: PubMed Central journal article supplement — Blood Adv. 2022 Oct 1;7(17):4721–7. doi: 10.1182/bloodadvances.2022008644 (PMC10468364; doi:10.1182/bloodadvances.2022008644), 2022-10-01
Supplement: BLOODA_ADV-2022-008644-mmc1.pdf [file BLOODA_ADV-2022-008644-mmc1.pdf]

**Supplement Table 1.** Types of VTE present in an incident CAT event, based on underlying cancer type.

| Cancer                      | PE         | Proximal DVT | Distal DVT | Upper Extremity DVT | DVT NOS   | Abdominal thrombosis | Intra-thoracic thrombosis | Cerebral Venous Thrombosis |
|-----------------------------|------------|--------------|------------|---------------------|-----------|----------------------|---------------------------|----------------------------|
| <b>Solid tumor</b>          | <b>43%</b> | <b>16%</b>   | <b>7%</b>  | <b>12%</b>          | <b>7%</b> | <b>24%</b>           | <b>1%</b>                 | <b>0%</b>                  |
| <b>Gastrointestinal</b>     | 32%        | 12%          | 5%         | 9%                  | 5%        | 44%                  | 1%                        | 0%                         |
| <b>Lung / Intrathoracic</b> | 63%        | 15%          | 7%         | 17%                 | 5%        | 3%                   | 4%                        | 0%                         |
| <b>Genitourinary</b>        | 45%        | 23%          | 10%        | 9%                  | 12%       | 13%                  | 0%                        | 0%                         |
| <b>Gynecological</b>        | 57%        | 22%          | 7%         | 9%                  | 11%       | 7%                   | 2%                        | 0%                         |
| <b>Breast</b>               | 49%        | 12%          | 6%         | 25%                 | 10%       | 5%                   | 1%                        | 0%                         |
| <b>Other Solid</b>          | 45%        | 23%          | 7%         | 12%                 | 11%       | 10%                  | 0%                        | 1%                         |
|                             |            |              |            |                     |           |                      |                           |                            |
| <b>Hematologic</b>          | <b>32%</b> | <b>18%</b>   | <b>8%</b>  | <b>34%</b>          | <b>9%</b> | <b>7%</b>            | <b>2%</b>                 | <b>0%</b>                  |
| <b>Lymphoma</b>             | 33%        | 16%          | 7%         | 35%                 | 8%        | 9%                   | 3%                        | 1%                         |
| <b>Multiple Myeloma</b>     | 33%        | 25%          | 15%        | 18%                 | 15%       | 0%                   | 0%                        | 0%                         |
| <b>Myeloid</b>              | 28%        | 20%          | 7%         | 42%                 | 7%        | 4%                   | 3%                        | 1%                         |
|                             |            |              |            |                     |           |                      |                           |                            |
| <b>Multiple Cancers</b>     | 42%        | 21%          | 6%         | 19%                 | 10%       | 14%                  | 1%                        | 1%                         |

Note: Patients with an incident CAT event may have concurrent diagnoses of multiple VTE types, so percentages of VTE types are not mutually exclusive and total greater than 100%.

Abbreviations: VTE, venous thromboembolism; CAT, cancer-associated thrombosis; PE, pulmonary embolism; DVT, deep vein thrombosis; NOS, not otherwise specified
